# Supplementary material for: Master equation modeling of water dissociation in small ionic water clusters: Ag+(H2O)n, n = 4–6
Source: Royal Society of Chemistry journal article supplement (doi:10.1039/d4ra03518f), 2024-01-01
Supplement: d4ra03518f1.pdf [file d4ra03518f1.pdf]

## Supporting Information

### Master Equation Modeling of Water Dissociation in Small Ions: $\text{Ag}^+(\text{H}_2\text{O})_n$ , $n = 4-6$

Michael Hütter, Gabriel Schöpfer, Magdalena Salzburger, Martin K. Beyer,\* and Milan Ončák\*

Institut für Ionenphysik und Angewandte Physik, Universität Innsbruck, Technikerstraße 25, 6020 Innsbruck, Austria

E-Mail: [Martin.Beyer@uibk.ac.at](mailto:Martin.Beyer@uibk.ac.at), [Milan.Oncak@uibk.ac.at](mailto:Milan.Oncak@uibk.ac.at)

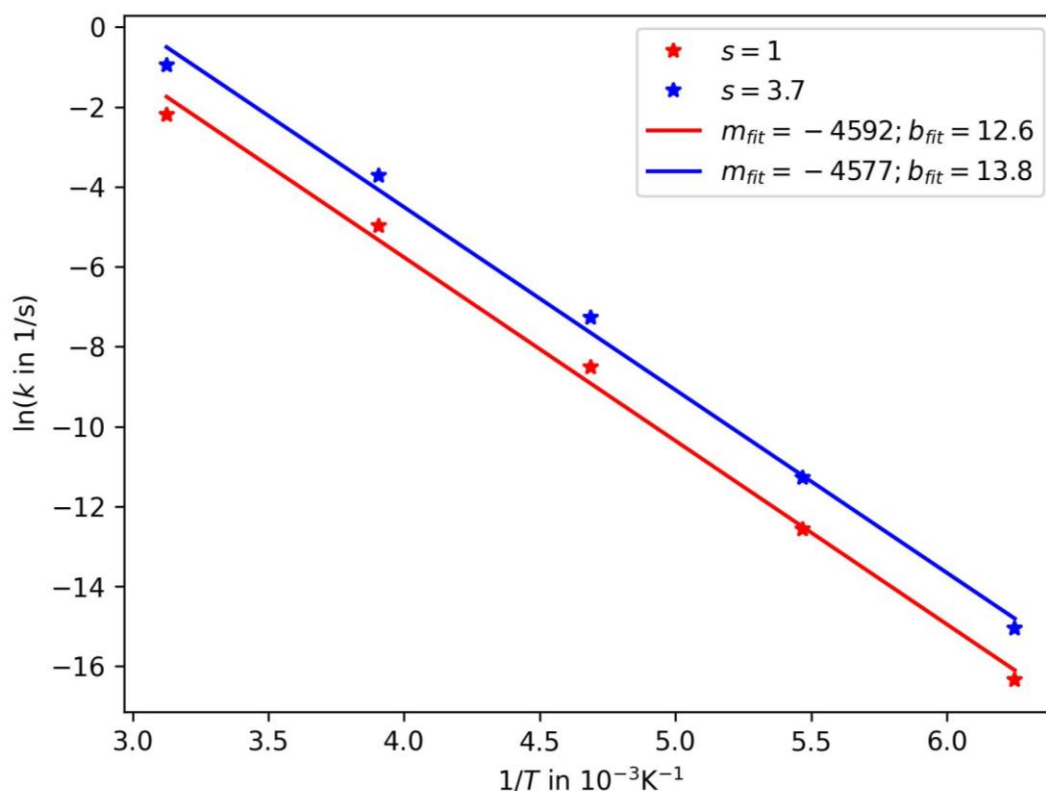

**Figure S1:** Effect of the empirical scaling factor  $s$ , controlling the IR intensities, on the slope  $m$  and constant offset  $b$  as introduced in the Arrhenius plot. Changing  $s$  mostly introduces a constant offset of the modeled MEM rate coefficients and only has a small effect on the resulting slope as fitted to the Arrhenius equation, see  $m_{\text{fit}}$  and  $b_{\text{fit}}$ . Illustrated for  $n = 4$  in the AWATAR approach for a temperature range of 160 K to 320 K.

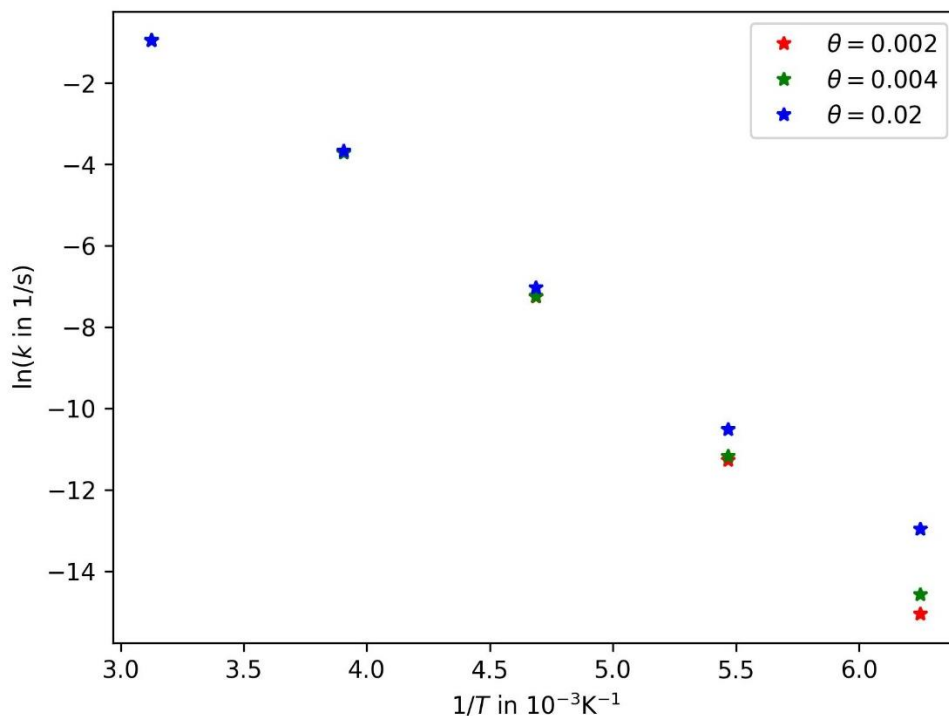

**Figure S2:** Rate coefficients for three different solid angle values (to model the influence of the ICR window, see Methods) illustrated for  $n = 4$  in the AWATAR approach. Differences become only important below 210 K, above this temperature, the difference in the logarithmic rate coefficients stays below 3%.

**Table S1:** Results of the MD simulations for isomer **4I**.  $E$  is the internal energy,  $\Delta E$  the total energy shift over the time period  $t$ , corresponding to the total simulation time with a timestep of 20 a.u. ( $\sim 0.48$  fs).  $V$  is the calculated volume in which the oxygen atom of the weakest bound water molecule was free to move over the simulation and  $\varepsilon$  refers to the relative error in the volume convergence.

| $E$ in kJ/mol | $\Delta E$ in meV/(atom $\times$ ps) | $t$ in ps | $V$ in $\text{\AA}^3$ | $\varepsilon$ in % |
|---------------|--------------------------------------|-----------|-----------------------|--------------------|
| 10.4          | 7.1                                  | 30        | 24.8                  | 1.3                |
| 20.3          | 5.4                                  | 29        | 34.8                  | 1.9                |
| 29.7          | 3.8                                  | 29        | 41.5                  | 0.5                |
| 39.8          | 5.2                                  | 28        | 43.9                  | 0.9                |
| 49.6          | 2.8                                  | 28        | 47.2                  | 1.0                |

**Table S2:** Comparison of the electronic energy of the isomers in Figure 1 at different levels of theory. For BLYP and B3LYP, the clusters were optimized at the respective levels. For CCSD(T)-F12A, single-point calculations in the B3LYP optimized structures were used, along with B3LYP zero-point energy correction. Unless noted otherwise, the aug-cc-pVTZ-PP basis set was used. Energy in kJ/mol. Structure 4IV was the only one that had to be added manually, as no such structure could be found by the genetic algorithm at the BLYP/def2SVP level of theory.

| Isomer | BLYP/def2SVP | B3LYP | CCSD(T)-F12A | CCSD(T)/CBS |
|--------|--------------|-------|--------------|-------------|
| 3I     | 10.8         | 7.6   | 0.0          | 0.0         |
| 3II    | 0.0          | 0.0   | 2.8          | 1.3         |
| 4I     | 12.5         | 12.1  | 0.0          | 0.0         |
| 4II    | 0.0          | 0.0   | 3.0          | 1.2         |
| 4III   | 1.2          | 0.4   | 3.3          | 1.5         |
| 4IV    | –            | 23.8  | 5.9          | 6.1         |
| 4V     | 10.9         | 8.3   | 9.9          | 8.2         |
| 4VI    | 17.0         | 14.4  | 17.4         | 15.6        |
| 4VII   | 44.7         | 45.5  | 25.8         | 25.7        |
| 5I     | 8.5          | 9.8   | 0.0          | 0.0         |
| 5II    | 0.0          | 0.0   | 4.2          | 6.8         |
| 5III   | 14.9         | 15.2  | 5.1          | 4.9         |
| 5IV    | 5.1          | 5.1   | 10.9         | 13.8        |
| 5V     | 7.6          | 20.3  | 12.1         | 10.5        |
| 5VI    | 13.7         | 26.1  | 18.9         | 18.3        |
| 5VII   | 7.4          | 18.7  | 19.0         | 19.4        |
| 5VIII  | 17.6         | 17.0  | 20.9         | 22.8        |
| 6I     | 9.5          | 10.7  | 0.0          | 0.0         |
| 6II    | 2.9          | 0.0   | 2.0          | 0.4         |
| 6III   | 9.2          | 16.6  | 3.0          | 2.6         |
| 6IV    | 1.4          | 20.9  | 3.2          | 1.2         |
| 6V     | 18.0         | 15.9  | 5.5          | 5.6         |
| 6VI    | 18.6         | 17.9  | 6.8          | 6.9         |
| 6VII   | 10.5         | 17.8  | 9.3          | 7.9         |
| 6VIII  | 0.0          | 9.7   | 9.6          | 7.8         |
| 6IX    | 9.6          | 23.8  | 14.4         | 12.4        |
| 6X     | 28.1         | 47.0  | 24.5         | 24.1        |

$\text{Ag}^+(\text{H}_2\text{O})_3$

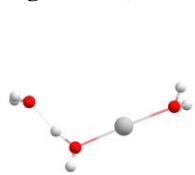

S3I  
0

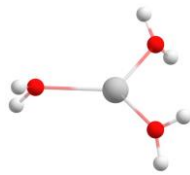

S3II  
10.8

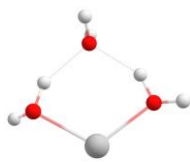

S3III  
37.8

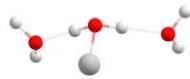

S3IV  
70.9

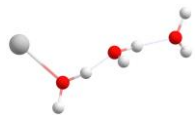

S3V  
78.9

$\text{Ag}^+(\text{H}_2\text{O})_4$

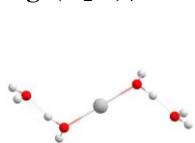

S4I  
0

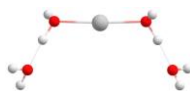

S4II  
1.2

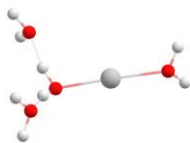

S4III  
10.9

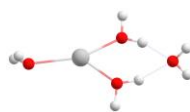

S4IV  
12.5

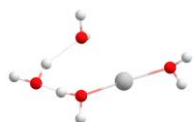

S4V  
16.9

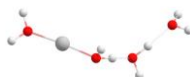

S4VI  
17.0

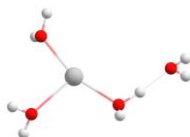

S4VII  
18.7

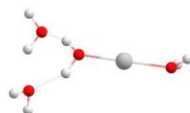

S4VIII  
18.9

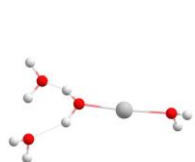

S4IX  
19.1

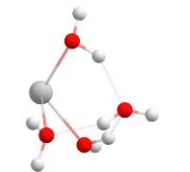

S4X  
44.7

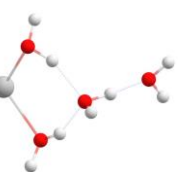

S4XI  
47.3

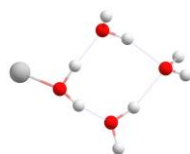

S4XII  
80.5

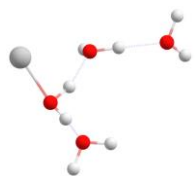

S4XIII  
90.4

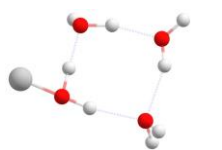

S4XIV  
90.5

$\text{Ag}^+(\text{H}_2\text{O})_5$

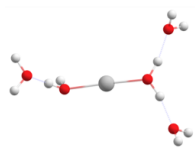

S5I  
0

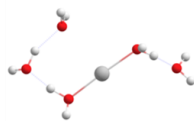

S5II  
4.8

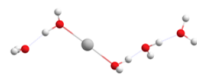

S5III  
5.1

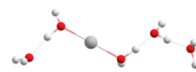

S5IV  
5.3

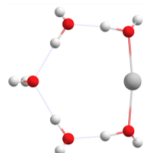

S5V  
7.4

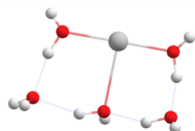

S5VI  
7.6

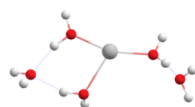

S5VII  
8.5

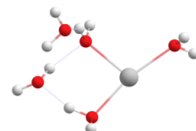

S5VIII  
13.7

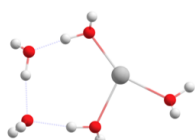

S5IX  
14.3

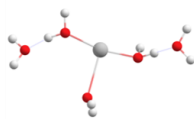

S5X  
14.5

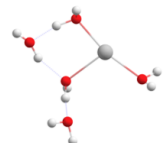

S5XI  
14.9

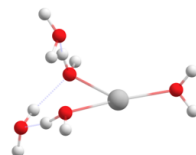

S5XII  
16.3

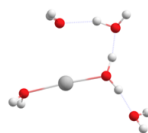

S5XIII  
17.6

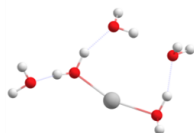

S5XIV  
19.2

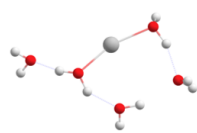

S5XV  
19.4

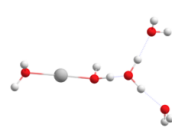

S5XVI  
27.7

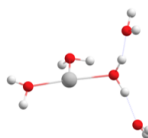

S5XVII  
27.8

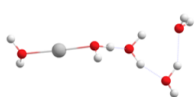

S5XVIII  
28.8

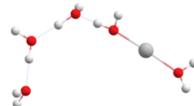

S5XIX  
32.6

### Ag<sup>+</sup>(H<sub>2</sub>O)<sub>6</sub>

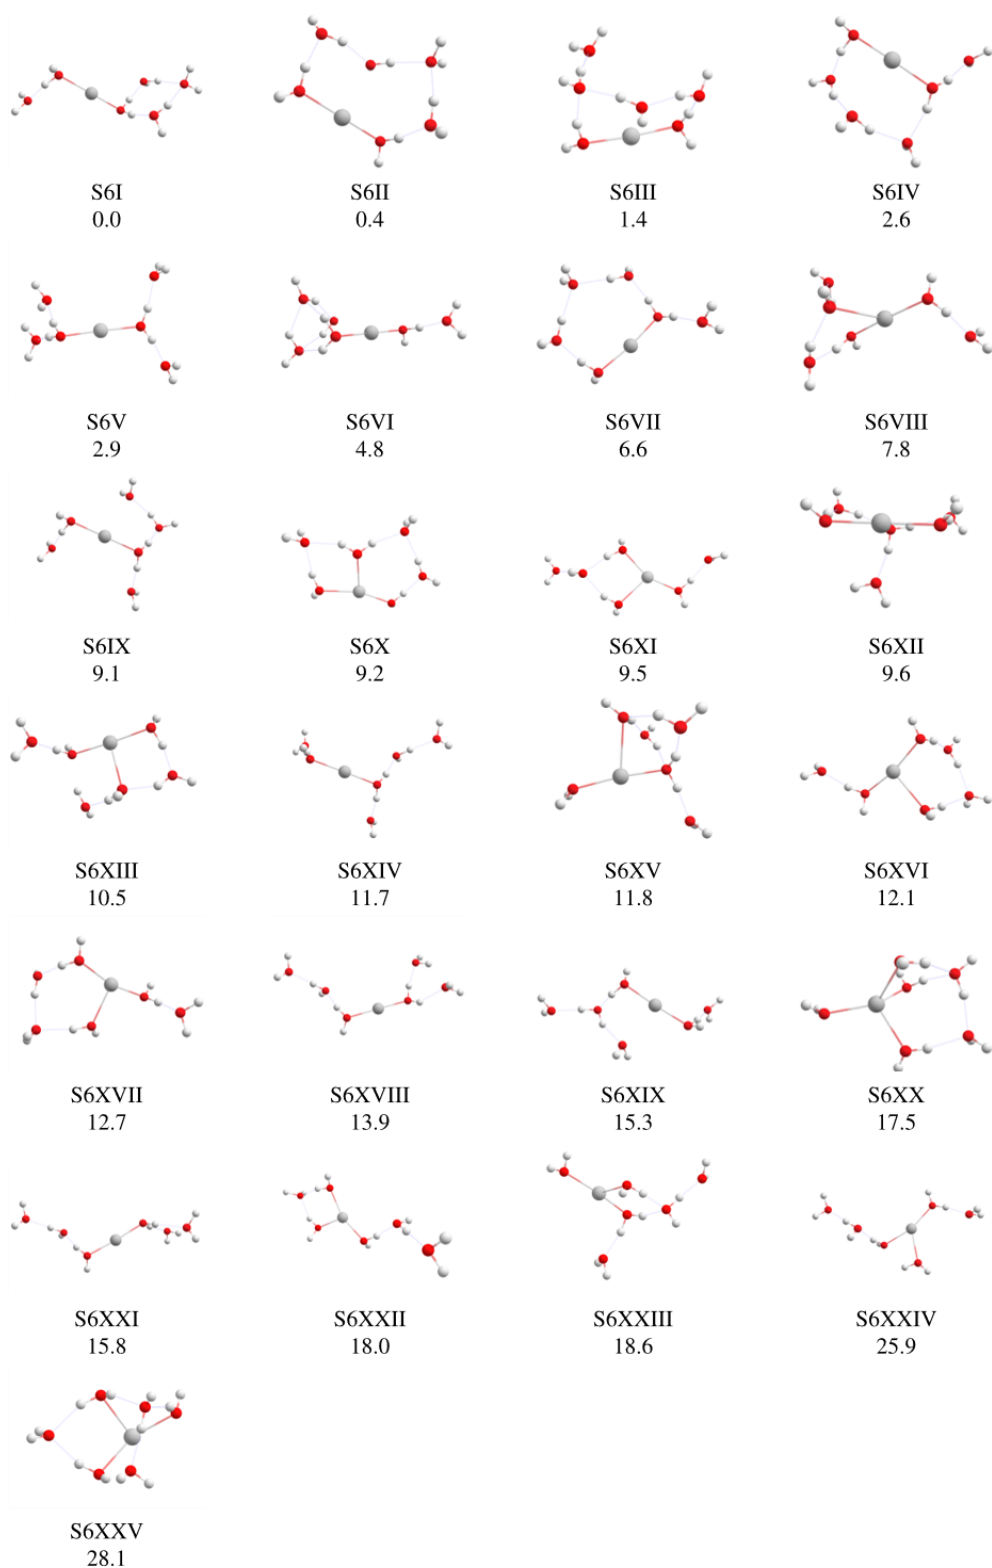

**Figure S3:** Intact structures as obtained from genetic algorithm runs at the BLYP/def2SVP level, along with relative zero point corrected electronic energy in kJ/mol.

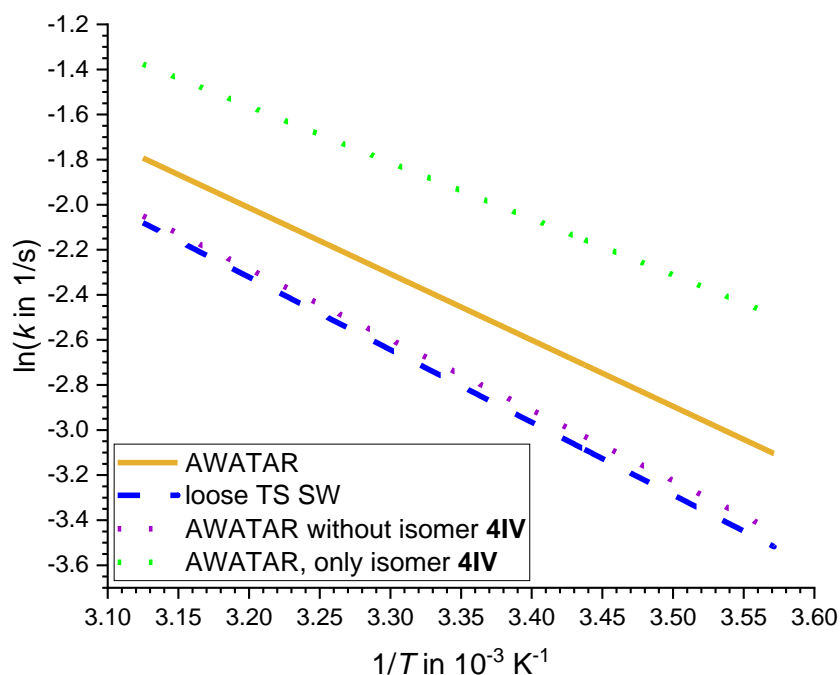

**Figure S4:** Influence of inclusion of isomer **4IV** on the dissociation rate coefficient: When isomer **4IV** is removed from the AWATAR approach (purple dotted line), the results are very similar to the single well approach (blue dashed line). The green dotted line shows the results if all reactants but isomer **4IV** are neglected.

**Table S3:** Slopes  $m$  as found in the Arrhenius plot by the linear fits of the calculated rate coefficients for  $n = 4-6$ , see Figure 2.

| $N$                          | 4          | 5          | 6          |
|------------------------------|------------|------------|------------|
| $m(\text{SW, tight TS})$ [k] | -4900      | -2900      | -2200      |
| $m(\text{SW, loose TS})$ [k] | -3200      | -2100      | -1600      |
| $m(\text{AWATAR})$ [k]       | -2900      | -2000      | -1500      |
| $m_{\text{exp}}$ [k]         | -3300(800) | -2400(600) | -2000(500) |

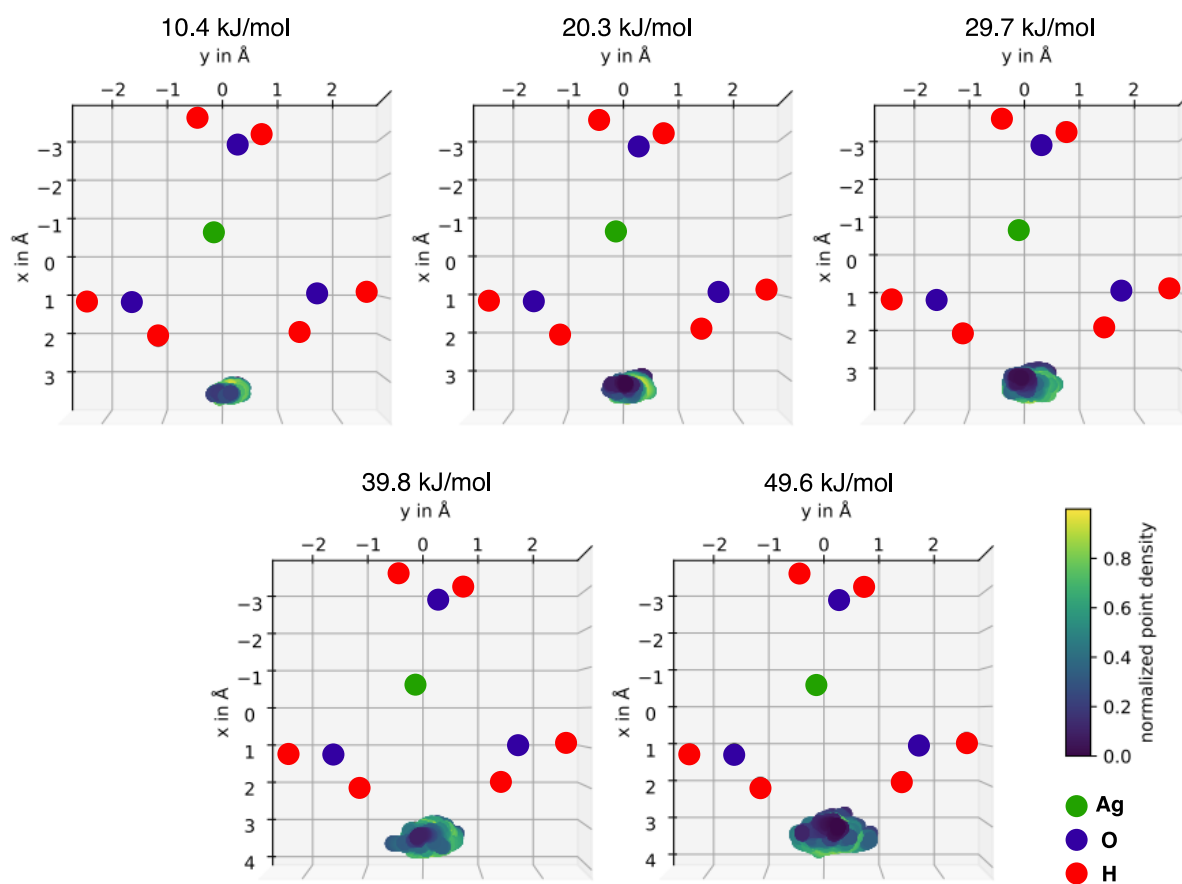

**Figure S5:** Resulting MD trajectories for  $\text{Ag}^+(\text{H}_2\text{O})_4$ , isomer **4I**, for different internal energies. The normalized point density was obtained from a kernel density estimation with a Gaussian kernel, a bandwidth of 0.5, and is proportional to the number of data points that correspond to this specific configuration as obtained from the trajectories.



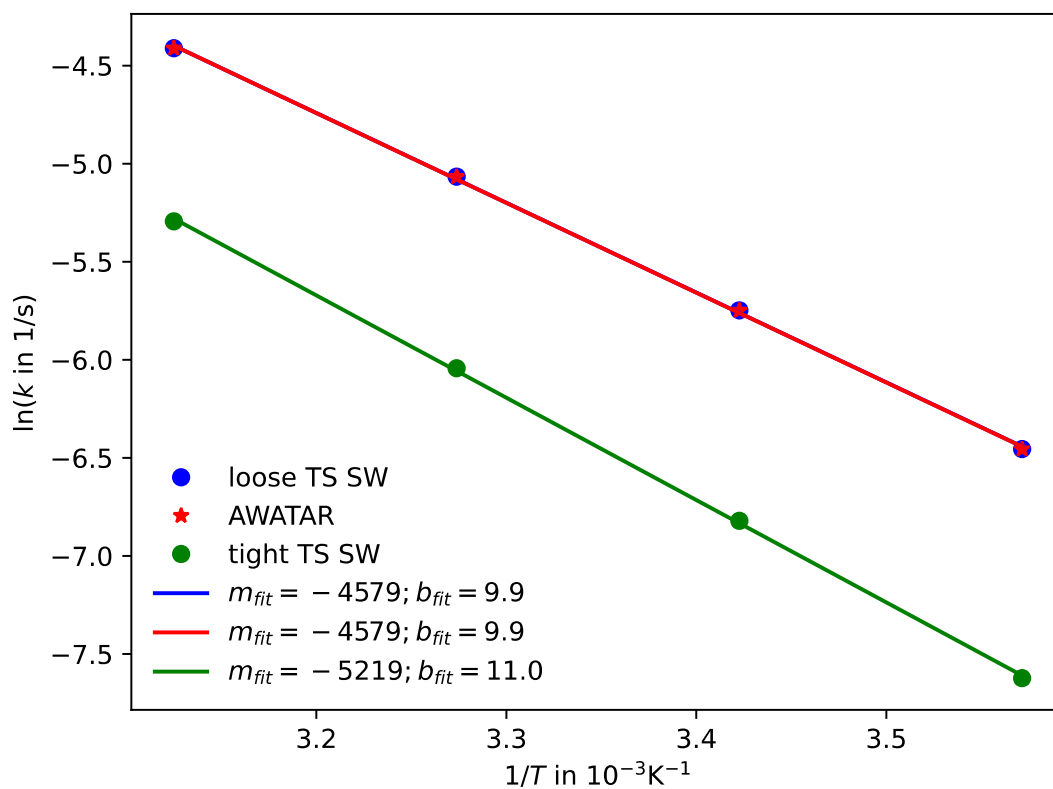

**Figure S6:** Arrhenius plot for  $\text{Ag}^+(\text{H}_2\text{O})_3$ , with the MEM rate coefficients (dots and asterisks) and the resulting linear fits (continuous lines) for the AWATAR approach (green) and single-well approach (blue and red lines). Note that visually no difference in the MEM rate coefficients and resulting fits for the AWATAR approach and the loose TS SW approach can be seen.

**Table S4:** Bond dissociation enthalpy (in kJ/mol) for  $\text{Ag}^+(\text{H}_2\text{O})_n$  calculated using different levels of theory. “XZ” stands for aug-cc-pVXZ(-PP) basis set.

| <i>n</i>                    | 1       | 2       | 3      |
|-----------------------------|---------|---------|--------|
| B3LYP/DZ                    | 127     | 118     | 61     |
| CCSD(T)/DZ//B3LYP/DZ        | 117     | 109     | 60     |
| CCSD(T)-F12A/TZ//B3LYP/DZ   | 123     | 114     | 60     |
| B3LYP/TZ                    | 127     | 117     | 60     |
| CCSD(T)/TZ//B3LYP/TZ        | 121     | 113     | 60     |
| CCSD(T)-F12A/TZ//B3LYP/TZ   | 123     | 114     | 60     |
| B3LYP/QZ                    | 127     | 118     | 60     |
| CCSD(T)/QZ//B3LYP/QZ        | 123     | 114     | -      |
| CCSD(T)-F12A/TZ//B3LYP/QZ   | 123     | 114     | 60     |
| M06/TZ                      | 123     | 114     | 59     |
| CCSD(T)/TZ//M06/TZ          | 121     | 113     | 60     |
| CCSD(T)-F12A/TZ//M06/TZ     | 123     | 115     | 60     |
| TPSSh/TZ                    | 126     | 119     | 62     |
| CCSD(T)/TZ//TPSSh/TZ        | 120     | 112     | 60     |
| CCSD(T)-F12A/TZ//TPSSh/TZ   | 123     | 114     | 59     |
| CCSD(T)/DZ                  | 111     | -       | -      |
| CCSD(T)-F12A/TZ//CCSD(T)/DZ | 123     | -       | -      |
| CCSD/DZ                     | 115     | 106     | -      |
| CCSD(T)/DZ//CCSD/DZ         | 117     | 110     | -      |
| CCSD(T)-F12A/TZ//CCSD/DZ    | 123     | 114     | -      |
| CCSD/TZ                     | 118     | 108     | -      |
| CCSD(T)/TZ//CCSD/TZ         | 121     | 113     | -      |
| CCSD(T)-F12A/TZ//CCSD/TZ    | 123     | 115     | -      |
| CCSD/QZ                     | 119     | -       | -      |
| CCSD(T)/QZ//CCSD/QZ         | 123     | -       | -      |
| CCSD(T)-F12A/TZ//CCSD/QZ    | 123     | -       | -      |
| experiment <sup>a</sup>     | 134 ± 8 | 127 ± 8 | 63 ± 9 |
| theory <sup>b</sup>         | 133     | 117     | 52     |

<sup>a</sup> – *Int. J. Mass Spectrom.* 228 (2003) 221–235.

<sup>b</sup> – *J. Chem. Phys.* 110 (1999) 1475–1491.

**Cartesian coordinates of the isomers considered in the MEM calculations with their zero-point corrected electronic energies in a.u. (B3LYP/aug-cc-pVTZ)**

2I: E = -299.661817

Ag 0.000000 0.000000 0.004168  
O 0.000000 2.167732 -0.033569  
H 0.404726 2.719271 0.646398  
H -0.674623 2.696698 -0.475788  
O -0.000000 -2.167732 -0.033569  
H -0.404726 -2.719271 0.646398  
H 0.674623 -2.696698 -0.475788

2II: E = -299.641450

Ag -0.929494 -0.112120 0.001010  
O 0.961886 0.931474 -0.045274  
H 1.839303 0.457427 0.006614  
H 1.073049 1.834138 0.270854  
O 3.193982 -0.429430 0.001776  
H 3.735857 -0.609853 0.778083  
H 3.791066 -0.428448 -0.755059

3I: E = -376.125701

|    |               |               |               |
|----|---------------|---------------|---------------|
| O  | -2.3944170000 | 0.0753700000  | -0.0440660000 |
| H  | -2.9902610000 | -0.6765440000 | 0.0472740000  |
| H  | -2.8935610000 | 0.8631980000  | 0.1982810000  |
| Ag | -0.1631500000 | -0.0794420000 | 0.0034400000  |
| O  | 1.6649340000  | -1.4448200000 | 0.0346290000  |
| H  | 1.7050540000  | -2.3960270000 | -0.1132170000 |
| H  | 2.5322530000  | -1.0845110000 | -0.1811380000 |
| O  | 1.4796450000  | 1.6880330000  | -0.0118870000 |
| H  | 1.7518900000  | 2.1528850000  | 0.7879640000  |
| H  | 1.5613690000  | 2.3261370000  | -0.7302370000 |

3II: E = -376.128586

|    |               |               |               |
|----|---------------|---------------|---------------|
| Ag | 0.5351000000  | 0.1173580000  | -0.0045700000 |
| H  | 2.9467300000  | -1.1719900000 | -0.6807690000 |
| O  | 2.5832950000  | -0.5927390000 | -0.0010490000 |
| H  | 3.0893670000  | -0.7383770000 | 0.8067320000  |
| H  | -4.0245910000 | -1.0322610000 | -0.7606330000 |
| O  | -3.5209590000 | -0.7549710000 | 0.0123630000  |
| H  | -4.1232230000 | -0.8016600000 | 0.7631450000  |
| H  | -1.6744140000 | 1.7344970000  | -0.3260640000 |
| O  | -1.4512030000 | 0.8735760000  | 0.0410250000  |
| H  | -2.2526390000 | 0.2870330000  | -0.0063480000 |

4I: E = -452.589669

|    |               |               |               |
|----|---------------|---------------|---------------|
| O  | -3.4360800000 | 0.0144160000  | -0.0083690000 |
| H  | -4.0152760000 | -0.0491880000 | -0.7778200000 |
| H  | -4.0229620000 | 0.0847850000  | 0.7546320000  |
| O  | 2.8692220000  | 0.0305980000  | -0.0531570000 |
| H  | 3.4042690000  | 0.7464410000  | 0.3065430000  |
| H  | 3.4243540000  | -0.7566090000 | -0.0663930000 |
| Ag | 0.6189050000  | -0.0106120000 | 0.0048370000  |
| O  | -1.0692490000 | 1.5913280000  | 0.0497670000  |
| H  | -1.0388580000 | 2.4890930000  | -0.2949660000 |
| H  | -1.9813430000 | 1.2658060000  | -0.0401360000 |
| O  | -1.0872670000 | -1.5798950000 | -0.0409900000 |
| H  | -1.9971060000 | -1.2447220000 | 0.0376620000  |
| H  | -1.0746010000 | -2.4884100000 | 0.2751410000  |

4II: E = -452.594263

|    |               |               |               |
|----|---------------|---------------|---------------|
| Ag | 0.0000920000  | -0.2936470000 | 0.0003910000  |
| H  | 2.7160800000  | 0.1518640000  | -0.3933610000 |
| H  | 2.2617720000  | -0.9715400000 | -1.4175280000 |
| H  | -4.3812510000 | 1.7011930000  | -0.0392120000 |
| H  | -4.5504070000 | 0.5318830000  | -1.0337040000 |
| H  | -2.2614650000 | -0.9663900000 | 1.4209570000  |
| H  | -2.7159870000 | 0.1533000000  | 0.3929590000  |
| H  | 4.5500040000  | 0.5358560000  | 1.0323190000  |
| H  | 4.3801580000  | 1.7019210000  | 0.0341400000  |
| O  | 1.9426870000  | -0.2500640000 | -0.8671240000 |

|   |               |               |               |
|---|---------------|---------------|---------------|
| O | -3.9346800000 | 0.9328680000  | -0.4111020000 |
| O | -1.9424440000 | -0.2469160000 | 0.8678860000  |
| O | 3.9340310000  | 0.9345260000  | 0.4084740000  |

4III: E = -452.594123

|    |               |               |               |
|----|---------------|---------------|---------------|
| Ag | -0.0002220000 | -0.4394590000 | 0.0000090000  |
| O  | 3.7134960000  | 1.4250160000  | -0.2998970000 |
| H  | 3.9753290000  | 2.2096570000  | 0.1934890000  |
| H  | 4.4350890000  | 1.2305770000  | -0.9079370000 |
| O  | 2.0661600000  | -0.4827980000 | 0.5052160000  |
| H  | 2.6975440000  | 0.2383320000  | 0.2504660000  |
| H  | 2.3766790000  | -0.8917640000 | 1.3185190000  |
| O  | -2.0667080000 | -0.4834510000 | -0.5048560000 |
| H  | -2.3769010000 | -0.8920310000 | -1.3184800000 |
| H  | -2.6974490000 | 0.2385580000  | -0.2508540000 |
| O  | -3.7119660000 | 1.4261710000  | 0.2995760000  |
| H  | -3.9737250000 | 2.2116370000  | -0.1925450000 |
| H  | -4.4339760000 | 1.2301140000  | 0.9066200000  |

4IV: E = -452.498491

|    |               |               |               |
|----|---------------|---------------|---------------|
| Ag | -0.3261290000 | -0.0720250000 | 0.0225790000  |
| O  | -2.5948630000 | 0.1257520000  | 0.0293240000  |
| H  | -3.1766020000 | -0.3726520000 | -0.5592370000 |
| H  | -3.1126820000 | 0.3253920000  | 0.8200460000  |
| O  | 1.2384360000  | 1.6069440000  | -0.9720260000 |
| H  | 1.0043680000  | 2.4922670000  | -1.2817230000 |
| H  | 1.7942880000  | 1.2279160000  | -1.6667670000 |
| O  | 1.5062190000  | 0.1783720000  | 1.6195260000  |
| H  | 1.9721040000  | 0.9882940000  | 1.3674980000  |
| H  | 1.5048890000  | 0.1561170000  | 2.5856410000  |
| O  | 1.3615340000  | -1.5713100000 | -0.7967530000 |
| H  | 1.2611840000  | -2.3997730000 | -1.2838470000 |
| H  | 1.9899040000  | -1.7504470000 | -0.0834100000 |

4V: E = -452.591087

|    |               |               |               |
|----|---------------|---------------|---------------|
| O  | 2.5980490000  | 2.3089310000  | 0.1271600000  |
| H  | 3.0429330000  | 2.7654010000  | -0.5948880000 |
| H  | 3.0022960000  | 2.6300950000  | 0.9398560000  |
| Ag | -0.7933830000 | -0.0030870000 | -0.0376650000 |
| O  | 2.6195960000  | -2.2996730000 | 0.1241670000  |
| H  | 3.0537160000  | -2.5956630000 | 0.9310740000  |
| H  | 3.0690510000  | -2.7444500000 | -0.6024260000 |
| O  | -2.9527850000 | 0.0473210000  | 0.1671910000  |
| H  | -3.4068330000 | -0.2661170000 | 0.9576970000  |
| H  | -3.5433810000 | -0.0965670000 | -0.5811610000 |
| O  | 1.2895730000  | -0.0004350000 | -0.3016430000 |
| H  | 1.8212790000  | -0.8056280000 | -0.1083170000 |
| H  | 1.8144890000  | 0.8088680000  | -0.1065780000 |

4VI: E = -452.588789

|    |               |               |               |
|----|---------------|---------------|---------------|
| O  | -2.7502050000 | -0.4178030000 | 0.8537520000  |
| H  | -3.1197820000 | -0.9618660000 | 1.5556350000  |
| H  | -3.4977370000 | 0.0561670000  | 0.4277320000  |
| O  | -4.7644830000 | 0.9546130000  | -0.3664220000 |
| H  | -5.0775920000 | 1.8035730000  | -0.0370420000 |
| H  | -5.5011790000 | 0.5675200000  | -0.8507240000 |
| O  | -0.6238780000 | -1.2127850000 | -0.3364530000 |
| H  | -0.8189520000 | -1.6468250000 | -1.1720900000 |
| H  | -1.4905830000 | -0.9125050000 | 0.0891070000  |
| Ag | 1.1463540000  | -0.0888600000 | -0.0815290000 |
| O  | 2.9649450000  | 1.0379690000  | 0.2794640000  |
| H  | 3.2739180000  | 1.7316430000  | -0.3146040000 |
| H  | 3.7422260000  | 0.6427720000  | 0.6911180000  |

4VII: E = -452.576939

|    |               |               |               |
|----|---------------|---------------|---------------|
| O  | -0.2271750000 | 1.9689850000  | -0.6815560000 |
| H  | -1.1210580000 | 1.6864940000  | -0.9312880000 |
| H  | 0.0739750000  | 2.6148660000  | -1.3300790000 |
| Ag | 0.7824250000  | 0.0006670000  | -0.0330620000 |
| O  | -0.6771280000 | 0.0028270000  | 2.0243320000  |
| H  | -0.6471960000 | 0.7733270000  | 2.6049690000  |
| H  | -0.6447960000 | -0.7646590000 | 2.6088170000  |
| O  | -0.2226370000 | -1.9715430000 | -0.6765210000 |
| H  | 0.0800160000  | -2.6185820000 | -1.3231870000 |
| H  | -1.1172230000 | -1.6919630000 | -0.9269740000 |
| O  | -2.3445670000 | -0.0032810000 | -0.5161910000 |
| H  | -3.2662110000 | -0.0046890000 | -0.8002580000 |

|                       |               |               |               |
|-----------------------|---------------|---------------|---------------|
| H                     | -2.3594290000 | -0.0020240000 | 0.4513890000  |
| 5I: E = -529.052055   |               |               |               |
| O                     | -2.2494040000 | -0.8486570000 | -0.1879410000 |
| H                     | -2.5549880000 | -1.7125470000 | 0.1029440000  |
| H                     | -2.9785840000 | -0.2034030000 | -0.0348440000 |
| O                     | 3.8673740000  | 0.7081490000  | -0.0100510000 |
| H                     | 4.4713820000  | 0.8062540000  | -0.7559130000 |
| H                     | 4.3933710000  | 0.8903520000  | 0.7783200000  |
| O                     | -4.1822120000 | 0.9919850000  | 0.1331290000  |
| H                     | -4.6127100000 | 1.2363000000  | 0.9591540000  |
| H                     | -4.8256030000 | 1.1539430000  | -0.5651540000 |
| Ag                    | -0.1321820000 | -0.2599470000 | -0.0291920000 |
| O                     | 1.1850540000  | 1.6579040000  | 0.0119110000  |
| H                     | 2.1484890000  | 1.5522680000  | -0.0656450000 |
| H                     | 0.9521260000  | 2.5246470000  | -0.3338150000 |
| O                     | 1.9235780000  | -1.3706020000 | 0.2028070000  |
| H                     | 2.1258270000  | -2.2879490000 | -0.0037760000 |
| H                     | 2.7381240000  | -0.8525990000 | 0.0919060000  |
| 5II: E = -529.055770  |               |               |               |
| Ag                    | 0.2926600000  | -0.0097980000 | -0.2184150000 |
| H                     | 3.0711220000  | -0.0005650000 | -0.1845720000 |
| H                     | -3.4149250000 | 2.7785270000  | 0.9782700000  |
| H                     | -2.2621710000 | -0.7904630000 | 0.3341520000  |
| H                     | 4.8901150000  | -0.6919430000 | 1.0923370000  |
| H                     | -3.6217920000 | -2.6214230000 | -0.5056020000 |
| H                     | 4.6974540000  | 0.8211740000  | 1.3324660000  |
| H                     | -3.6383580000 | 2.6123860000  | -0.5368700000 |
| H                     | -2.2545730000 | 0.8173060000  | 0.3214490000  |
| H                     | 2.6111910000  | 0.3048030000  | -1.6684670000 |
| H                     | -3.4414350000 | -2.7367990000 | 1.0206150000  |
| O                     | -3.1092040000 | -2.2862570000 | 0.2371030000  |
| O                     | 2.3308090000  | -0.0870560000 | -0.8361780000 |
| O                     | -1.7047980000 | 0.0117110000  | 0.4401580000  |
| O                     | 4.2713150000  | 0.0363620000  | 0.9723990000  |
| O                     | -3.0870770000 | 2.3211740000  | 0.1967370000  |
| 5III: E = -529.049992 |               |               |               |
| Ag                    | -0.7625140000 | -0.1087190000 | -0.0524960000 |
| H                     | 0.5986310000  | 2.5001400000  | 0.1435000000  |
| H                     | 3.1058760000  | -3.2712780000 | -0.4642390000 |
| H                     | 3.0220780000  | 2.5211530000  | 0.7864200000  |
| H                     | 2.9798990000  | 2.6054040000  | -0.7480490000 |
| H                     | -3.6439440000 | -0.3087320000 | 0.2179860000  |
| H                     | 1.9827360000  | 0.3646380000  | -0.1802440000 |
| H                     | 2.9246890000  | -3.1202520000 | 1.0584090000  |
| H                     | 1.8934030000  | -1.2210270000 | -0.1217070000 |
| H                     | -0.8648440000 | 3.0364850000  | 0.0782170000  |
| H                     | -3.1670200000 | -1.6990730000 | -0.2691700000 |
| O                     | -2.8703990000 | -0.8765210000 | 0.1348810000  |
| O                     | -0.3345830000 | 2.2530750000  | 0.2525450000  |
| O                     | 1.4167550000  | -0.4001250000 | -0.3670310000 |
| O                     | 2.5137100000  | 2.2433730000  | 0.0150620000  |
| O                     | 2.6503510000  | -2.7570120000 | 0.2103140000  |
| 5IV: E = -529.053809  |               |               |               |
| O                     | -5.2845710000 | 0.9760180000  | 0.0490980000  |
| H                     | -5.5507640000 | 1.7979740000  | 0.4740680000  |
| H                     | -6.0644900000 | 0.6473660000  | -0.4098450000 |
| O                     | 2.3721850000  | 1.0944320000  | -0.0664530000 |
| H                     | 3.2211490000  | 0.6776640000  | 0.2288290000  |
| H                     | 2.5792120000  | 1.8129390000  | -0.6713860000 |
| O                     | -3.2014260000 | -0.5319800000 | 0.9774490000  |
| H                     | -3.5220160000 | -1.1217470000 | 1.6660680000  |
| H                     | -3.9701180000 | -0.0133410000 | 0.6567950000  |
| Ag                    | 0.5958380000  | -0.0595500000 | -0.2919480000 |
| O                     | -1.1575510000 | -1.2359340000 | -0.4240240000 |
| H                     | -1.9854630000 | -0.9680570000 | 0.0832430000  |
| H                     | -1.4224310000 | -1.6190690000 | -1.2651570000 |
| O                     | 4.5789190000  | -0.0662000000 | 0.8350500000  |
| H                     | 5.2641340000  | -0.5110990000 | 0.3253060000  |
| H                     | 4.9859630000  | 0.2055230000  | 1.6646790000  |
| 5V: E = -529.048051   |               |               |               |
| Ag                    | -0.2297700000 | -0.8274230000 | 0.0373340000  |
| O                     | -2.2142230000 | 2.1002080000  | -0.5578760000 |

|   |               |               |               |
|---|---------------|---------------|---------------|
| H | -1.3568470000 | 2.3791260000  | -0.2005770000 |
| H | -2.8166970000 | 2.8481600000  | -0.5017920000 |
| O | 0.3549600000  | 1.8321200000  | 0.6961110000  |
| H | 1.2724200000  | 1.9519710000  | 0.4052730000  |
| H | 0.3343630000  | 2.0960230000  | 1.6230920000  |
| O | -2.3489530000 | -0.4301000000 | 0.1459220000  |
| H | -2.4954630000 | 0.5142460000  | -0.1267530000 |
| H | -2.9713000000 | -0.9865890000 | -0.3335170000 |
| O | 1.9035630000  | -1.1723950000 | -0.2588650000 |
| H | 2.3795560000  | -1.9455920000 | 0.0598550000  |
| H | 2.4874060000  | -0.3905990000 | -0.1981020000 |
| O | 3.1400170000  | 1.3261590000  | -0.2380800000 |
| H | 3.8802250000  | 1.5517580000  | 0.3389960000  |
| H | 3.4026220000  | 1.6224400000  | -1.1188620000 |

5VI: E = -529.045835

|    |               |               |               |
|----|---------------|---------------|---------------|
| Ag | -0.8542220000 | -0.1349890000 | -0.0706220000 |
| O  | -2.1942840000 | 1.6069620000  | 0.4056590000  |
| H  | -2.9972630000 | 1.4726140000  | 0.9224360000  |
| H  | -2.4151990000 | 2.2471280000  | -0.2807330000 |
| O  | 2.5758680000  | 2.5085070000  | -0.6808340000 |
| H  | 2.7156550000  | 3.4249350000  | -0.4192540000 |
| H  | 3.2660470000  | 2.3105650000  | -1.3230550000 |
| O  | 1.4346700000  | 0.5643660000  | 0.8753980000  |
| H  | 1.8710760000  | 1.2799800000  | 0.3602520000  |
| H  | 1.4445010000  | 0.8541710000  | 1.7943990000  |
| O  | -0.1024690000 | -2.0489020000 | -0.8214610000 |
| H  | -0.6546100000 | -2.8369820000 | -0.8224270000 |
| H  | 0.7629440000  | -2.2713890000 | -0.3868410000 |
| O  | 2.1463280000  | -2.1750030000 | 0.5237520000  |
| H  | 2.2634710000  | -1.2306180000 | 0.7166350000  |
| H  | 3.0108830000  | -2.5533590000 | 0.3377230000  |

5VII: E = -529.048660

|    |               |               |               |
|----|---------------|---------------|---------------|
| Ag | 1.1483960000  | -0.0006060000 | 0.0024700000  |
| H  | -3.8775540000 | 0.0044870000  | -0.8497310000 |
| H  | 1.3837780000  | -2.6787290000 | -0.5582890000 |
| H  | -2.3072820000 | 1.6791930000  | 0.0240290000  |
| H  | -2.1758430000 | 3.1975050000  | 0.3497140000  |
| H  | 1.3872840000  | 2.6767800000  | -0.5575090000 |
| H  | -0.0545530000 | 2.3438670000  | 0.0209170000  |
| H  | -2.3114600000 | -1.6777770000 | 0.0195780000  |
| H  | -2.1802670000 | -3.1954000000 | 0.3492850000  |
| H  | -0.0574250000 | -2.3435970000 | 0.0204130000  |
| H  | -4.0243620000 | 0.0009470000  | 0.6776120000  |
| O  | 0.9093340000  | -2.1183210000 | 0.0647630000  |
| O  | -1.7104760000 | 2.4440300000  | -0.0269170000 |
| O  | 0.9119480000  | 2.1174670000  | 0.0658590000  |
| O  | -1.7133610000 | -2.4419800000 | -0.0254800000 |
| O  | -3.3670590000 | 0.0014540000  | -0.0297370000 |

5VIII: E = -529.049291

|    |               |               |               |
|----|---------------|---------------|---------------|
| O  | -4.5515490000 | 1.4158180000  | 0.8098080000  |
| H  | -5.3839610000 | 0.9579730000  | 0.9655800000  |
| H  | -4.7151170000 | 2.3417010000  | 1.0172950000  |
| Ag | 1.2272950000  | 0.1790300000  | -0.0405970000 |
| O  | -0.8721410000 | -3.3145500000 | 0.4433600000  |
| H  | -0.8955590000 | -4.0747850000 | -0.1474790000 |
| H  | -1.3757510000 | -3.5664260000 | 1.2242640000  |
| O  | -2.6140910000 | 0.6800770000  | -1.0079180000 |
| H  | -3.3240950000 | 0.9272790000  | -0.3807650000 |
| H  | -2.9936170000 | 0.7174730000  | -1.8904840000 |
| O  | 3.0427140000  | 1.2653580000  | 0.4490160000  |
| H  | 3.3930610000  | 1.2971460000  | 1.3464570000  |
| H  | 3.7946090000  | 1.2902930000  | -0.1538850000 |
| O  | -0.5185880000 | -0.8328390000 | -0.5901730000 |
| H  | -1.3556500000 | -0.3071480000 | -0.7107440000 |
| H  | -0.7175420000 | -1.7088210000 | -0.1949020000 |

6I: E = -605.512357

|   |               |               |               |
|---|---------------|---------------|---------------|
| O | 2.7937310000  | -0.6581010000 | -0.5427280000 |
| H | 3.1886750000  | -1.5272860000 | -0.4293630000 |
| H | 3.4908660000  | 0.0132060000  | -0.3608510000 |
| O | 4.6330020000  | 1.2656060000  | -0.1199100000 |
| H | 5.1268910000  | 1.4266770000  | 0.6907890000  |
| H | 5.1825060000  | 1.5909430000  | -0.8408240000 |
| O | -1.1996160000 | -1.6441250000 | 0.3391550000  |

|    |               |               |               |
|----|---------------|---------------|---------------|
| H  | -1.3889860000 | -2.4879000000 | -0.0809360000 |
| H  | -2.0420210000 | -1.1594300000 | 0.4380110000  |
| O  | -5.2805520000 | 0.6380700000  | -0.9687940000 |
| H  | -5.8986140000 | -0.0345130000 | -1.2730870000 |
| H  | -5.7013470000 | 1.4866770000  | -1.1412330000 |
| Ag | 0.6848280000  | -0.2876010000 | 0.0014610000  |
| O  | -3.2221030000 | 0.2149810000  | 0.7692210000  |
| H  | -3.9767090000 | 0.3689690000  | 0.1573840000  |
| H  | -3.5932350000 | 0.2085690000  | 1.6582820000  |
| O  | -0.7486570000 | 1.4439280000  | 0.5575210000  |
| H  | -0.6863450000 | 2.3477140000  | 0.2357690000  |
| H  | -1.6950440000 | 1.2007520000  | 0.6016640000  |

6II: E = -605.516416

|    |               |               |               |
|----|---------------|---------------|---------------|
| Ag | 0.0000070000  | 0.1227320000  | 0.0000030000  |
| H  | 2.6591270000  | 0.6493300000  | -0.3055810000 |
| H  | -3.7039480000 | -2.0179570000 | -2.2000240000 |
| H  | -2.6591170000 | 0.6493250000  | 0.3056030000  |
| H  | 4.0851290000  | 2.4137680000  | -1.0620110000 |
| H  | -3.9460910000 | 1.4254790000  | 2.2365310000  |
| H  | 3.9460560000  | 1.4255990000  | -2.2364980000 |
| H  | -3.6536930000 | -2.7959380000 | -0.8716450000 |
| H  | -2.5469580000 | -0.6399000000 | -0.6410040000 |
| H  | 2.5469670000  | -0.6399340000 | 0.6409920000  |
| H  | -4.0851700000 | 2.4136930000  | 1.0620830000  |
| O  | -3.5846710000 | 1.6526340000  | 1.3739020000  |
| O  | 2.0819950000  | 0.1625980000  | 0.3209280000  |
| O  | -2.0819810000 | 0.1626250000  | -0.3209280000 |
| O  | 3.5846430000  | 1.6527110000  | -1.3738540000 |
| O  | -3.2619480000 | -2.0551160000 | -1.3453270000 |
| H  | 3.6536710000  | -2.7959990000 | 0.8715670000  |
| O  | 3.2619370000  | -2.0551810000 | 1.3452650000  |
| H  | 3.7039200000  | -2.0180580000 | 2.1999720000  |

6III: E = -605.510092

|    |               |               |               |
|----|---------------|---------------|---------------|
| O  | 2.5998110000  | -0.6004560000 | -0.0603370000 |
| H  | 2.9100600000  | 0.3147250000  | 0.0767050000  |
| H  | 3.2496090000  | -1.2021520000 | 0.3146080000  |
| O  | 3.0610460000  | 2.1562700000  | 0.1225000000  |
| H  | 3.4711580000  | 2.5804300000  | 0.8854940000  |
| H  | 3.5004150000  | 2.5309420000  | -0.6505530000 |
| O  | -1.5981150000 | -1.8565560000 | -0.0321230000 |
| H  | -1.7851230000 | -2.5935510000 | 0.5569880000  |
| H  | -2.3516260000 | -1.2171640000 | 0.0322780000  |
| O  | -2.4834060000 | 2.6894710000  | 0.0041030000  |
| H  | -2.7108580000 | 3.2348180000  | -0.7586580000 |
| H  | -2.7556510000 | 3.1988200000  | 0.7770420000  |
| Ag | 0.3800510000  | -0.9121000000 | -0.0144590000 |
| O  | -3.5183240000 | -0.0164920000 | 0.1273930000  |
| H  | -4.3829260000 | -0.1334420000 | -0.2780130000 |
| H  | -3.2756360000 | 0.9184700000  | 0.0236510000  |
| O  | 0.1805080000  | 1.5172000000  | -0.1882590000 |
| H  | -0.6189530000 | 2.0504950000  | -0.0608580000 |
| H  | 0.9549830000  | 2.0707950000  | -0.0253170000 |

6IV: E = -605.508461

|    |               |               |               |
|----|---------------|---------------|---------------|
| Ag | 0.0013050000  | -1.0773750000 | 0.0002060000  |
| H  | 2.8280750000  | 2.4302940000  | -0.2182650000 |
| H  | -0.8477590000 | 1.7981040000  | -1.3448320000 |
| H  | 0.8434300000  | 1.8021260000  | 1.3438730000  |
| H  | -2.7521560000 | -1.4765370000 | 0.3423790000  |
| H  | -2.4054000000 | 0.0207420000  | -0.0346790000 |
| H  | 0.0997800000  | 1.6295970000  | 2.7013340000  |
| H  | 2.7558780000  | -1.4704690000 | -0.3404990000 |
| H  | 2.4054590000  | 0.0263690000  | 0.0349880000  |
| H  | -0.1040290000 | 1.6249650000  | -2.7021770000 |
| H  | 1.4893810000  | 1.8776970000  | -0.8367030000 |
| H  | -1.4937550000 | 1.8751280000  | 0.8353990000  |
| H  | -2.8337940000 | 2.4238320000  | 0.2163460000  |
| O  | -2.1580860000 | -0.9218570000 | -0.1738190000 |
| O  | 2.1340000000  | 1.7728850000  | -0.1024880000 |
| O  | 0.0006760000  | 1.5299740000  | 1.7488320000  |
| O  | 2.1602640000  | -0.9166700000 | 0.1748640000  |
| O  | -2.1381430000 | 1.7679630000  | 0.1012940000  |
| O  | -0.0045150000 | 1.5270510000  | -1.7495370000 |

6V: E = -605.510373

|                        |               |               |               |
|------------------------|---------------|---------------|---------------|
| O                      | -1.5551610000 | -1.1765000000 | -0.0601850000 |
| H                      | -1.7458390000 | -2.0968800000 | 0.1398940000  |
| H                      | -2.3007650000 | -0.6224060000 | 0.3022140000  |
| O                      | 4.2703260000  | 1.2560250000  | -0.2060390000 |
| H                      | 4.7584950000  | 1.5519160000  | -0.9836280000 |
| H                      | 4.8538530000  | 1.4151870000  | 0.5458570000  |
| O                      | -3.4663080000 | 0.3788450000  | 0.8331330000  |
| H                      | -3.7170420000 | 0.4420520000  | 1.7590780000  |
| H                      | -4.2813500000 | 0.5230360000  | 0.3097000000  |
| Ag                     | 0.4968690000  | -0.4216280000 | 0.0018990000  |
| O                      | 1.4791970000  | 1.7118180000  | 0.2295850000  |
| H                      | 2.4268930000  | 1.8091720000  | 0.0415860000  |
| H                      | 1.0560090000  | 2.5591430000  | 0.0626800000  |
| O                      | 2.7142220000  | -1.1257060000 | -0.1012940000 |
| O                      | 3.0326840000  | -1.9468900000 | -0.4875710000 |
| H                      | 3.4042520000  | -0.4513050000 | -0.2206880000 |
| O                      | -5.7346790000 | 0.8033940000  | -0.6661840000 |
| H                      | -6.0484130000 | 1.6657600000  | -0.9560930000 |
| H                      | -6.4523660000 | 0.1847390000  | -0.8343980000 |
| 6VI: E = -605.509599   |               |               |               |
| Ag                     | 1.1477270000  | -0.2486920000 | -0.0792360000 |
| O                      | -2.6558860000 | -0.2591480000 | 0.8507420000  |
| H                      | -3.3950270000 | -0.4656180000 | 0.2361800000  |
| H                      | -3.0670660000 | -0.0324900000 | 1.6914650000  |
| O                      | -4.7114380000 | -0.8488520000 | -0.8454700000 |
| H                      | -5.1010420000 | -1.7172450000 | -0.9885240000 |
| H                      | -5.1702620000 | -0.2444510000 | -1.4374120000 |
| O                      | -0.0984700000 | 3.8822900000  | 0.1649230000  |
| H                      | 0.0049970000  | 4.3884020000  | 0.9769810000  |
| H                      | -0.2885420000 | 4.5224060000  | -0.5285770000 |
| O                      | -0.5151730000 | 1.2010140000  | -0.2209320000 |
| H                      | -1.3463370000 | 0.8845240000  | 0.1788290000  |
| H                      | -0.4059470000 | 2.1551100000  | -0.0339910000 |
| O                      | 3.2731030000  | -0.9734030000 | -0.3089660000 |
| H                      | 3.9591980000  | -0.4112640000 | -0.6851270000 |
| H                      | 3.4645720000  | -1.8733490000 | -0.5949300000 |
| O                      | -0.4186590000 | -1.9251370000 | 0.6966450000  |
| H                      | -0.2988250000 | -2.6213120000 | 1.3492470000  |
| H                      | -1.2867090000 | -1.5103010000 | 0.8644460000  |
| 6VII: E = -605.509638  |               |               |               |
| O                      | -2.6608680000 | 0.3782330000  | 0.7090830000  |
| H                      | -3.5388420000 | 0.1690580000  | 0.3746370000  |
| H                      | -2.4742970000 | 1.3389820000  | 0.5306690000  |
| O                      | -1.7689830000 | 2.7632130000  | 0.0770410000  |
| H                      | 0.1702980000  | 1.5223180000  | -2.1709330000 |
| H                      | -1.7407030000 | 3.5902220000  | 0.5670390000  |
| O                      | 0.8780050000  | -1.8705910000 | -0.3428690000 |
| H                      | 1.1302890000  | -2.6493950000 | 0.1627820000  |
| H                      | 1.6723640000  | -1.2978270000 | -0.4599770000 |
| O                      | 4.4489130000  | 0.8181580000  | 1.1648420000  |
| H                      | 5.0689390000  | 0.2633750000  | 1.6497820000  |
| H                      | 4.7573460000  | 1.7238140000  | 1.2746890000  |
| Ag                     | -0.9413450000 | -0.7696180000 | 0.0999980000  |
| O                      | 2.7951490000  | -0.0156150000 | -0.8179270000 |
| H                      | 3.4125030000  | 0.2866290000  | -0.1110630000 |
| H                      | 3.3414250000  | -0.1806220000 | -1.5946640000 |
| O                      | 0.3177530000  | 1.3892250000  | -1.2279450000 |
| H                      | -0.8832740000 | 2.5914790000  | -0.2833790000 |
| H                      | 1.2473960000  | 1.1130270000  | -1.1373150000 |
| 6VIII: E = -605.507359 |               |               |               |
| Ag                     | -1.0920890000 | 0.2311700000  | -0.0477570000 |
| H                      | 3.6108320000  | -0.8391160000 | 0.2802110000  |
| H                      | -0.9588390000 | 2.9288600000  | -0.6413560000 |
| H                      | 1.6880560000  | -2.0906740000 | -0.6467260000 |
| H                      | 1.3124620000  | -3.5500600000 | -1.0710760000 |
| H                      | -2.1441060000 | -2.2780080000 | -0.4563900000 |
| H                      | -0.5589260000 | -2.3262420000 | -0.3669100000 |
| H                      | 0.7264210000  | -0.6407500000 | 2.8613650000  |
| H                      | 1.0723130000  | 0.8383830000  | 2.6253630000  |
| H                      | 2.4252810000  | 1.0527440000  | -0.7576300000 |
| H                      | 2.5905570000  | 2.3335620000  | -1.6442550000 |
| H                      | 0.4914910000  | 2.2862900000  | -0.5354340000 |
| H                      | 2.2472160000  | -0.4711110000 | 0.9398280000  |
| O                      | -0.4331830000 | 2.2743960000  | -0.1700730000 |
| O                      | 0.9547030000  | -2.6691670000 | -0.9263290000 |



|   |               |               |               |
|---|---------------|---------------|---------------|
| O | -1.3826880000 | -1.8976120000 | -0.0061060000 |
| O | 0.9679260000  | -0.0081180000 | 2.1744800000  |
| O | 2.0596730000  | 1.9354300000  | -0.9484080000 |
| O | 2.6867490000  | -0.6485390000 | 0.0836350000  |

6IX: E = -605.498503

|    |               |               |               |
|----|---------------|---------------|---------------|
| O  | 1.4116470000  | 0.4002880000  | -1.3592280000 |
| H  | 2.1854500000  | 0.4102880000  | -0.7666300000 |
| H  | 1.0523780000  | 1.3007680000  | -1.3641150000 |
| O  | 0.6462410000  | -0.4116410000 | 1.8331040000  |
| H  | 0.1073420000  | 0.3299920000  | 2.1407800000  |
| H  | 1.5654260000  | -0.1094320000 | 1.8106040000  |
| O  | -1.6426390000 | 1.5401200000  | 1.4434720000  |
| H  | -2.4714430000 | -0.0361500000 | 0.7132520000  |
| H  | -2.1515960000 | 2.1064010000  | 2.0339980000  |
| Ag | -0.2260340000 | -0.8722510000 | -0.4125180000 |
| O  | -0.3890220000 | 2.7934420000  | -0.9280890000 |
| H  | -0.9957230000 | 2.8760210000  | -1.6747180000 |
| H  | -0.0035420000 | 3.6721130000  | -0.8235790000 |
| O  | -2.4370490000 | -0.7858430000 | 0.0899740000  |
| H  | -2.9229540000 | -1.5211970000 | 0.4781490000  |
| H  | -1.3199410000 | 2.1102830000  | 0.7245050000  |
| O  | 3.3714940000  | 0.1677520000  | 0.7275480000  |
| H  | 3.8973530000  | -0.6410180000 | 0.6994620000  |
| H  | 3.9954690000  | 0.8647880000  | 0.9623790000  |
